# Supplementary material for: Flower-like ZnO grown on urchin-like CuO microspheres for catalytic synthesis of dimethyldichlorosilane
Source: Royal Society of Chemistry journal article supplement (doi:10.1039/c3ra00171g), 2013-01-01
Supplement: c3ra00171g.pdf [file c3ra00171g.pdf]

## Supporting Information

### Flower-like ZnO Grown on Urchin-like CuO Microspheres for Catalytic Synthesis of Dimethyldichlorosilane

Yongxia Zhu,<sup>1,2</sup> Yingli Wang,<sup>\*,2</sup> Lianying Song,<sup>2</sup> Xin Chen,<sup>2</sup> Wuyuan Liu,<sup>2</sup>

Jin Sun,<sup>1</sup> Xilin She,<sup>\*,1</sup> Ziyi Zhong,<sup>3</sup> and Fabing Su<sup>\*,2</sup>

<sup>1</sup> *College of Chemical and Environmental Engineering, Qingdao University, Qingdao, China  
266071.*

<sup>2</sup> *State Key Laboratory of Multiphase Complex Systems, Institute of Process Engineering, Chinese  
Academy of Sciences, Beijing, China 100190.*

<sup>3</sup> *Institute of Chemical Engineering and Sciences, A\*star, 1 Pesek Road, Jurong Island, Singapore  
627833*

\*To whom correspondence should be addressed. E-mail address: wangyl@mail.ipe.ac.cn (Y. Wang), xlshe@126.com (X. She), fbsu@mail.ipe.ac.cn (F. Su), Tel.: +86-10-82544850, Fax: +86-10-82544851.

**Table S1.** The impurity level of other elements in the raw Si material

| impurity | Content (wt.%) |
|----------|----------------|
| Fe       | 0.21           |
| Al       | 0.15           |
| Ca       | 0.12           |
| Mg       | 0.003          |
| Cu       | 0.004          |
| Pb       | 0.001          |
| Ti       | 0.002          |
| Mn       | 0.001          |

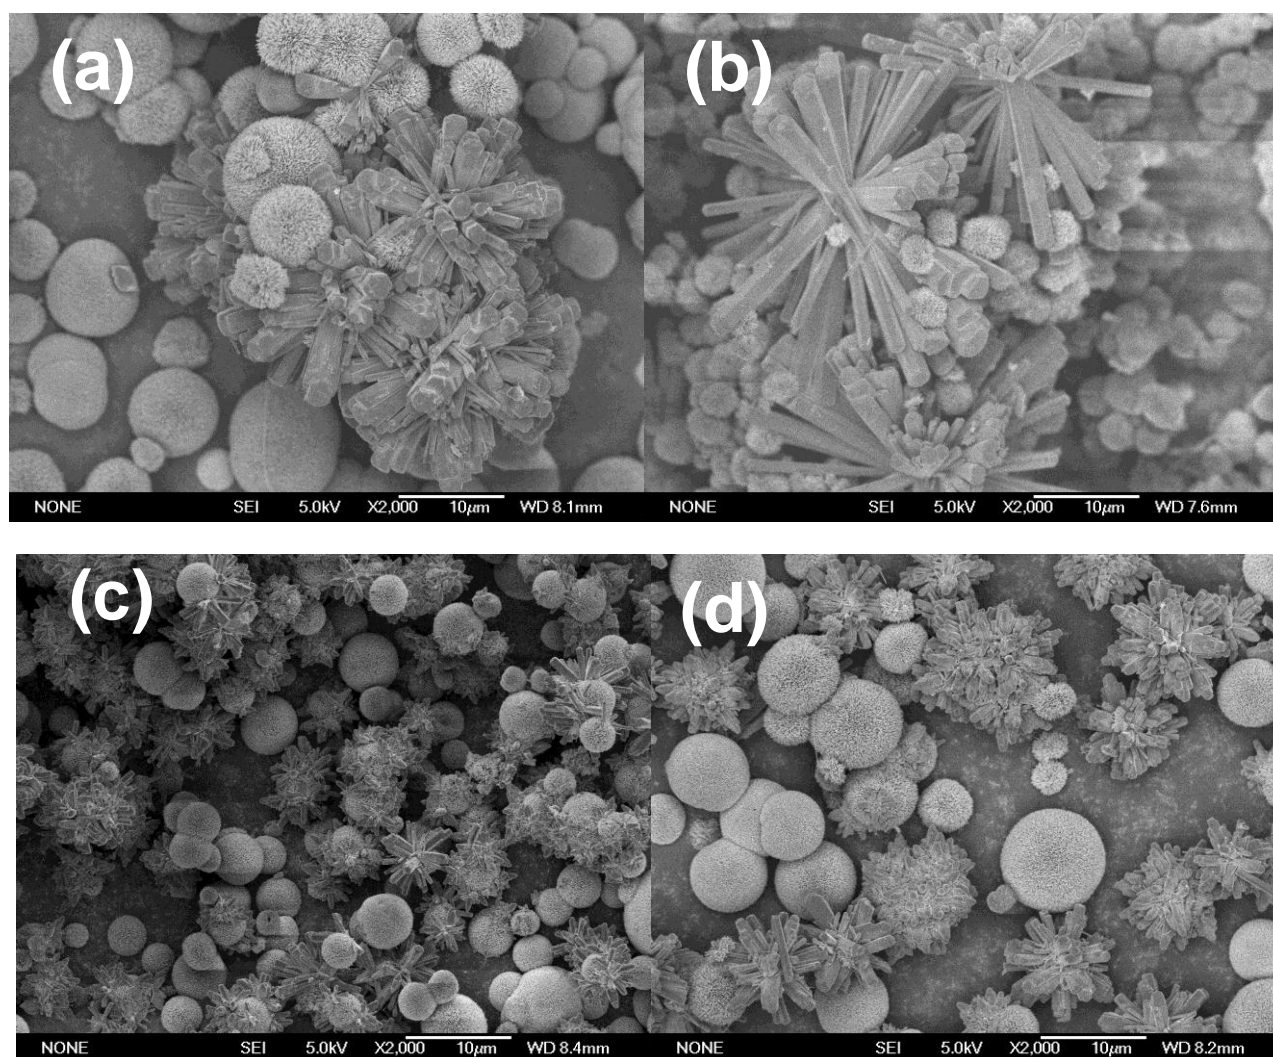

**Figure S1.** SEM images of the products prepared with different hydrothermal temperatures: (a) 80 °C (Z1), (b) 100 °C (Z2), (c) 130 °C (Z3), (d) 150 °C (Z4)

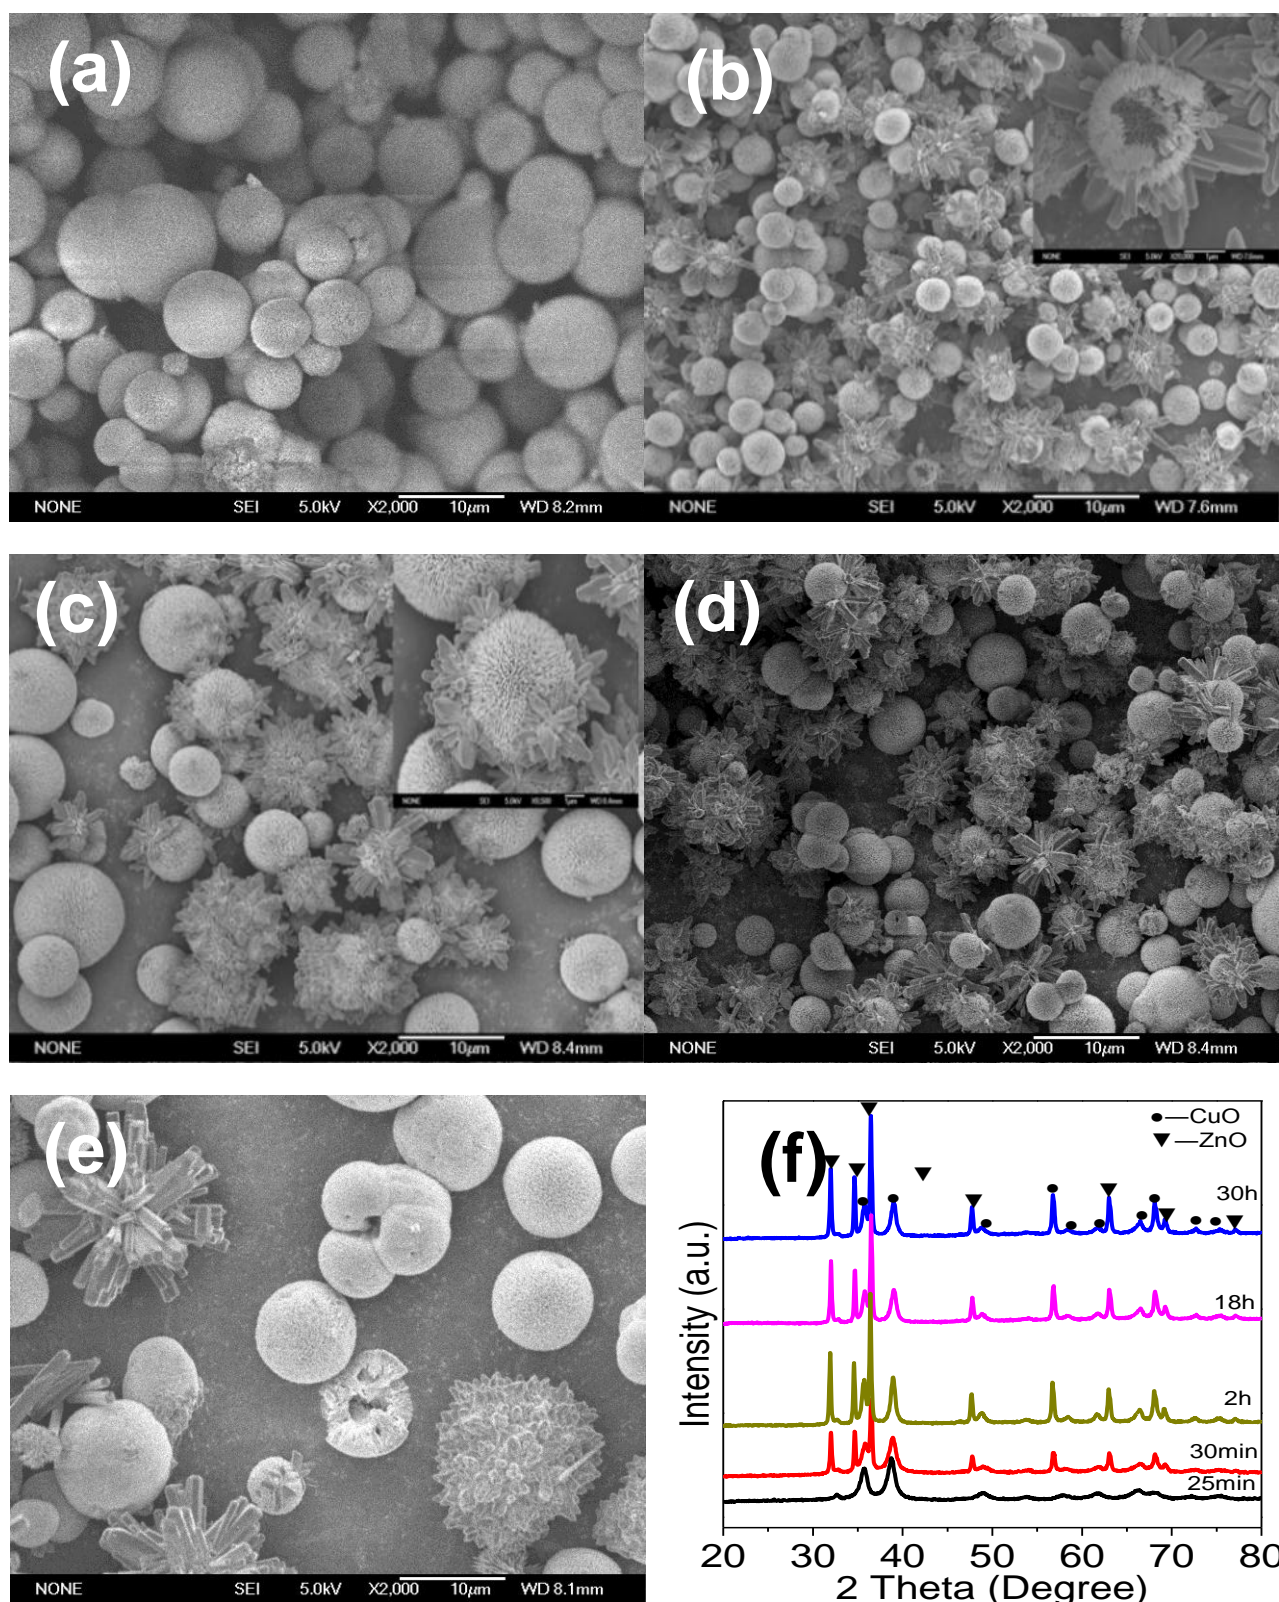

**Figure S2.** SEM images of the CuO-ZnO samples prepared with different reaction times: (a) 25 min (Z5), (b) 30 min (Z6), (c) 2 h (Z7), (d) 18 h (Z3), (e) 30 h (Z8), (f) XRD pattern of the products.

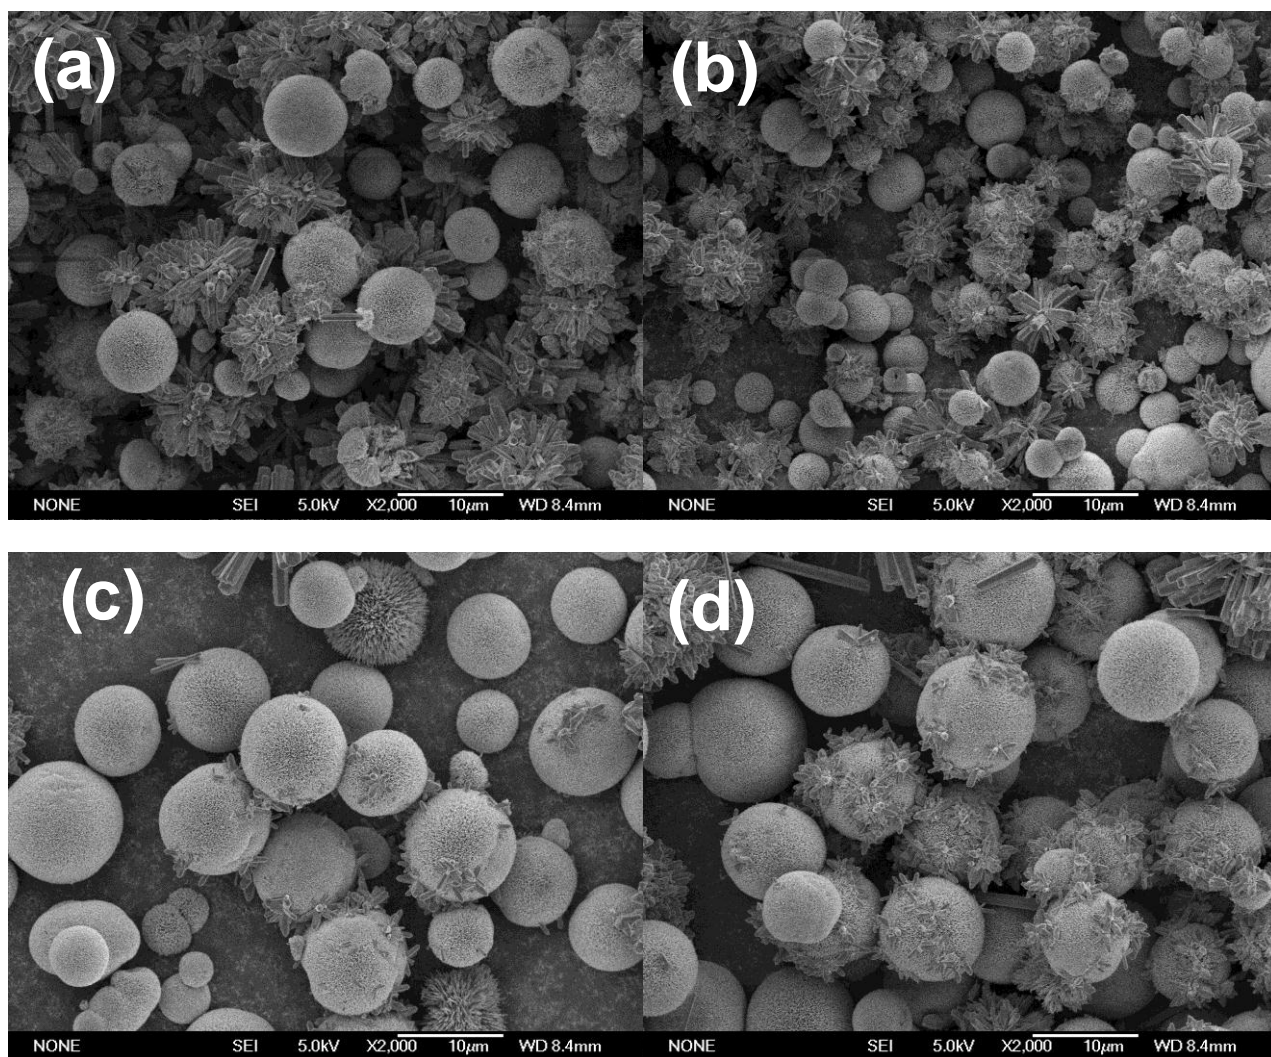

**Figure S3.** SEM images of the CuO-ZnO samples prepared with different amounts of mineralization agent: (a) 1 g (Z9), (b) 2 g (Z3), (c) 3 g (Z10), (d) 4 g (Z11)

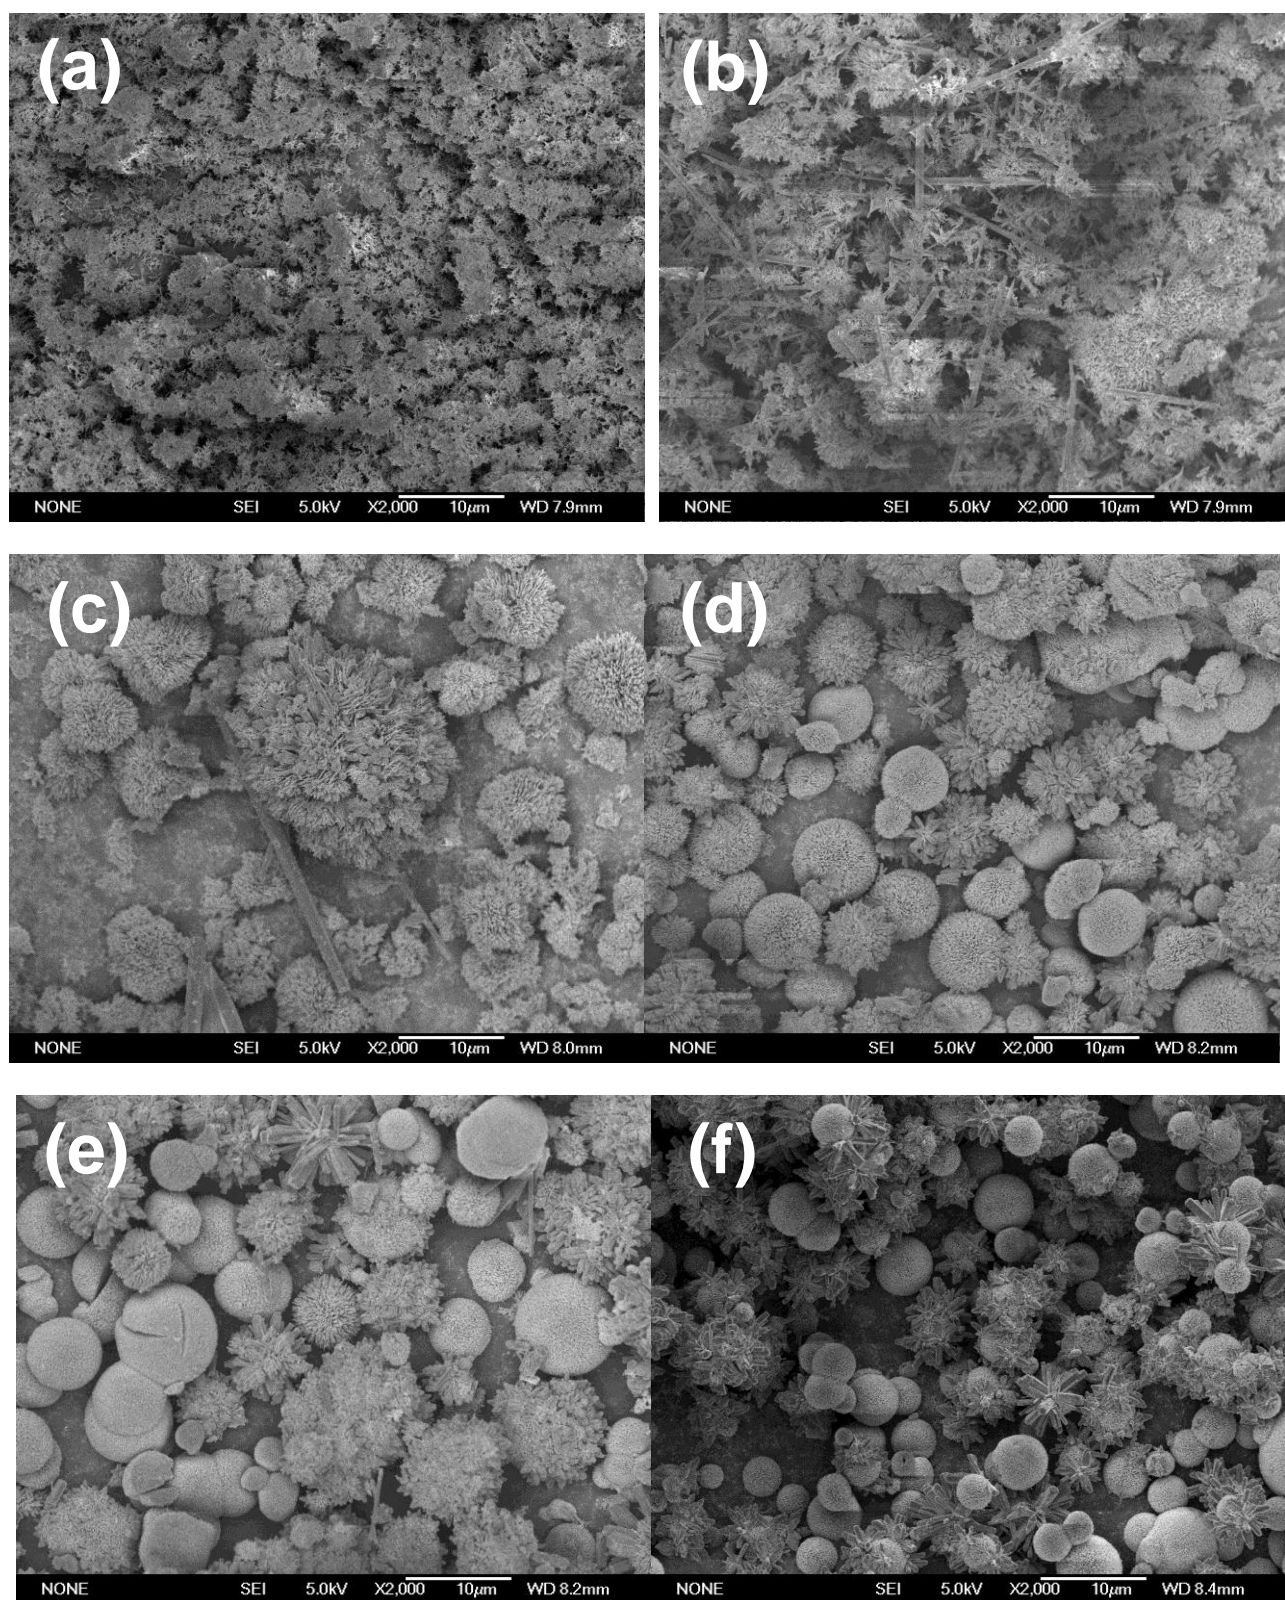

**Figure S4.** SEM images of the CuO-ZnO samples prepared with the different amounts of ammonia added: (a) 5 mL (Z12), (b) 10 mL (Z13), (c) 15 mL (Z14), (d) 20 mL (Z15), (e) 25 mL (Z16), and (f) 30 mL (Z17)

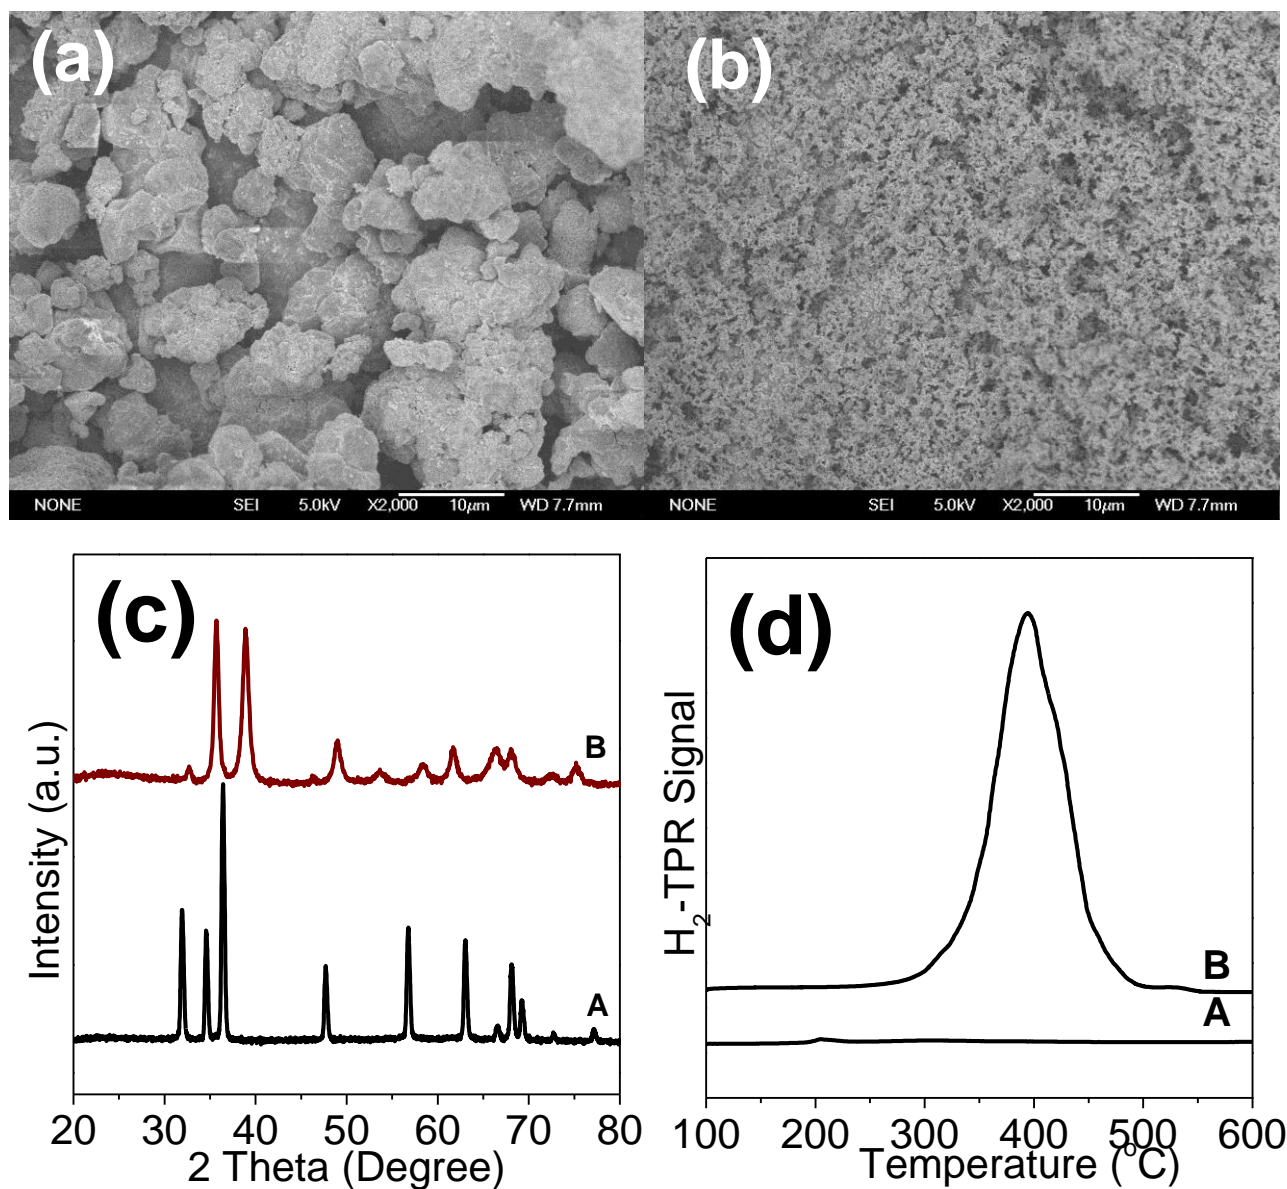

**Figure S5.** SEM images of (a) c-CuO, (b) c-ZnO, (c) XRD patterns, and (d) H<sub>2</sub>-TPR curves (A: c-ZnO and B: c-CuO)
